# Supplementary material for: A distinct species, Dodona formosana, detected in the Dodona eugenes species complex: clarification of the taxonomic status of the Punch butterfly in Taiwan
Source: Zookeys. 2018 Feb 8;(736):59–77. doi: 10.3897/zookeys.736.22062 (PMC5904550; doi:10.3897/zookeys.736.22062)
Supplement: Supplementary material 2 — Primer information [file zookeys-736-059-s002.xls]

## Sheet: 工作表1
Oligo ID	Bases	Gene	Diredtion	Position
cox-J-1460	TACAA TTTAT CGCCT AAACT TCAGC C	cox1	J	1460
Zcox-J-1530	CAACA AATCA TAAAG ATATT GG	cox1	J	1530
H1co1-1880F	TCAAG AAGAA TTGTA GAAAA TGG	cox1	N	1880
MiBocox-J-1920	ACAGT TTACC CCCCA CTTTC	cox1	J	1920
MiBocox-N-2010	AGTTG TAATA AAATT AATWG CTCCT A	cox1	N	2010
cox-N-2191	CCCGG TAAAA TTAAA ATATA AACTT C	cox1	N	2191
Chcox-N-2360	GAGCT CATAC AATAA ATCCT AAT	cox1	N	2360
C1-J-2600a	TCTAT AGGAG CTGTA TTTGC TA	cox1& cox2	J	2600
C1-J-2600c	TATTA TGTAG TAGCT CATTT TCA	cox1& cox2	J	2600
Gallc1-N-2750	CCTGC TAATC CTAAA AAATG TTG	cox1	N	2750
Cppcox-N-2770	TGG ATA ATC AGA ATA TCG TCG AGG	cox1	N	2779
cox-J-3138	AGAGC CTCTC CTTTA ATAGA ACA	cox2	J	3138
C2-N-3380	ATTCA TAWCT TCAAT ATCAT TG	cox2	N	3380
cox-N-3389	TCA TAA CTT CAA TAT CAT TG	cox2	N	3389
